# Supplementary material for: MicroRNA prediction based on 3D graphical representation of RNA secondary structures
Source: PubMed Central journal article supplement (PMC6713912; doi:10.3906/biy-1904-59), 2019-08-05

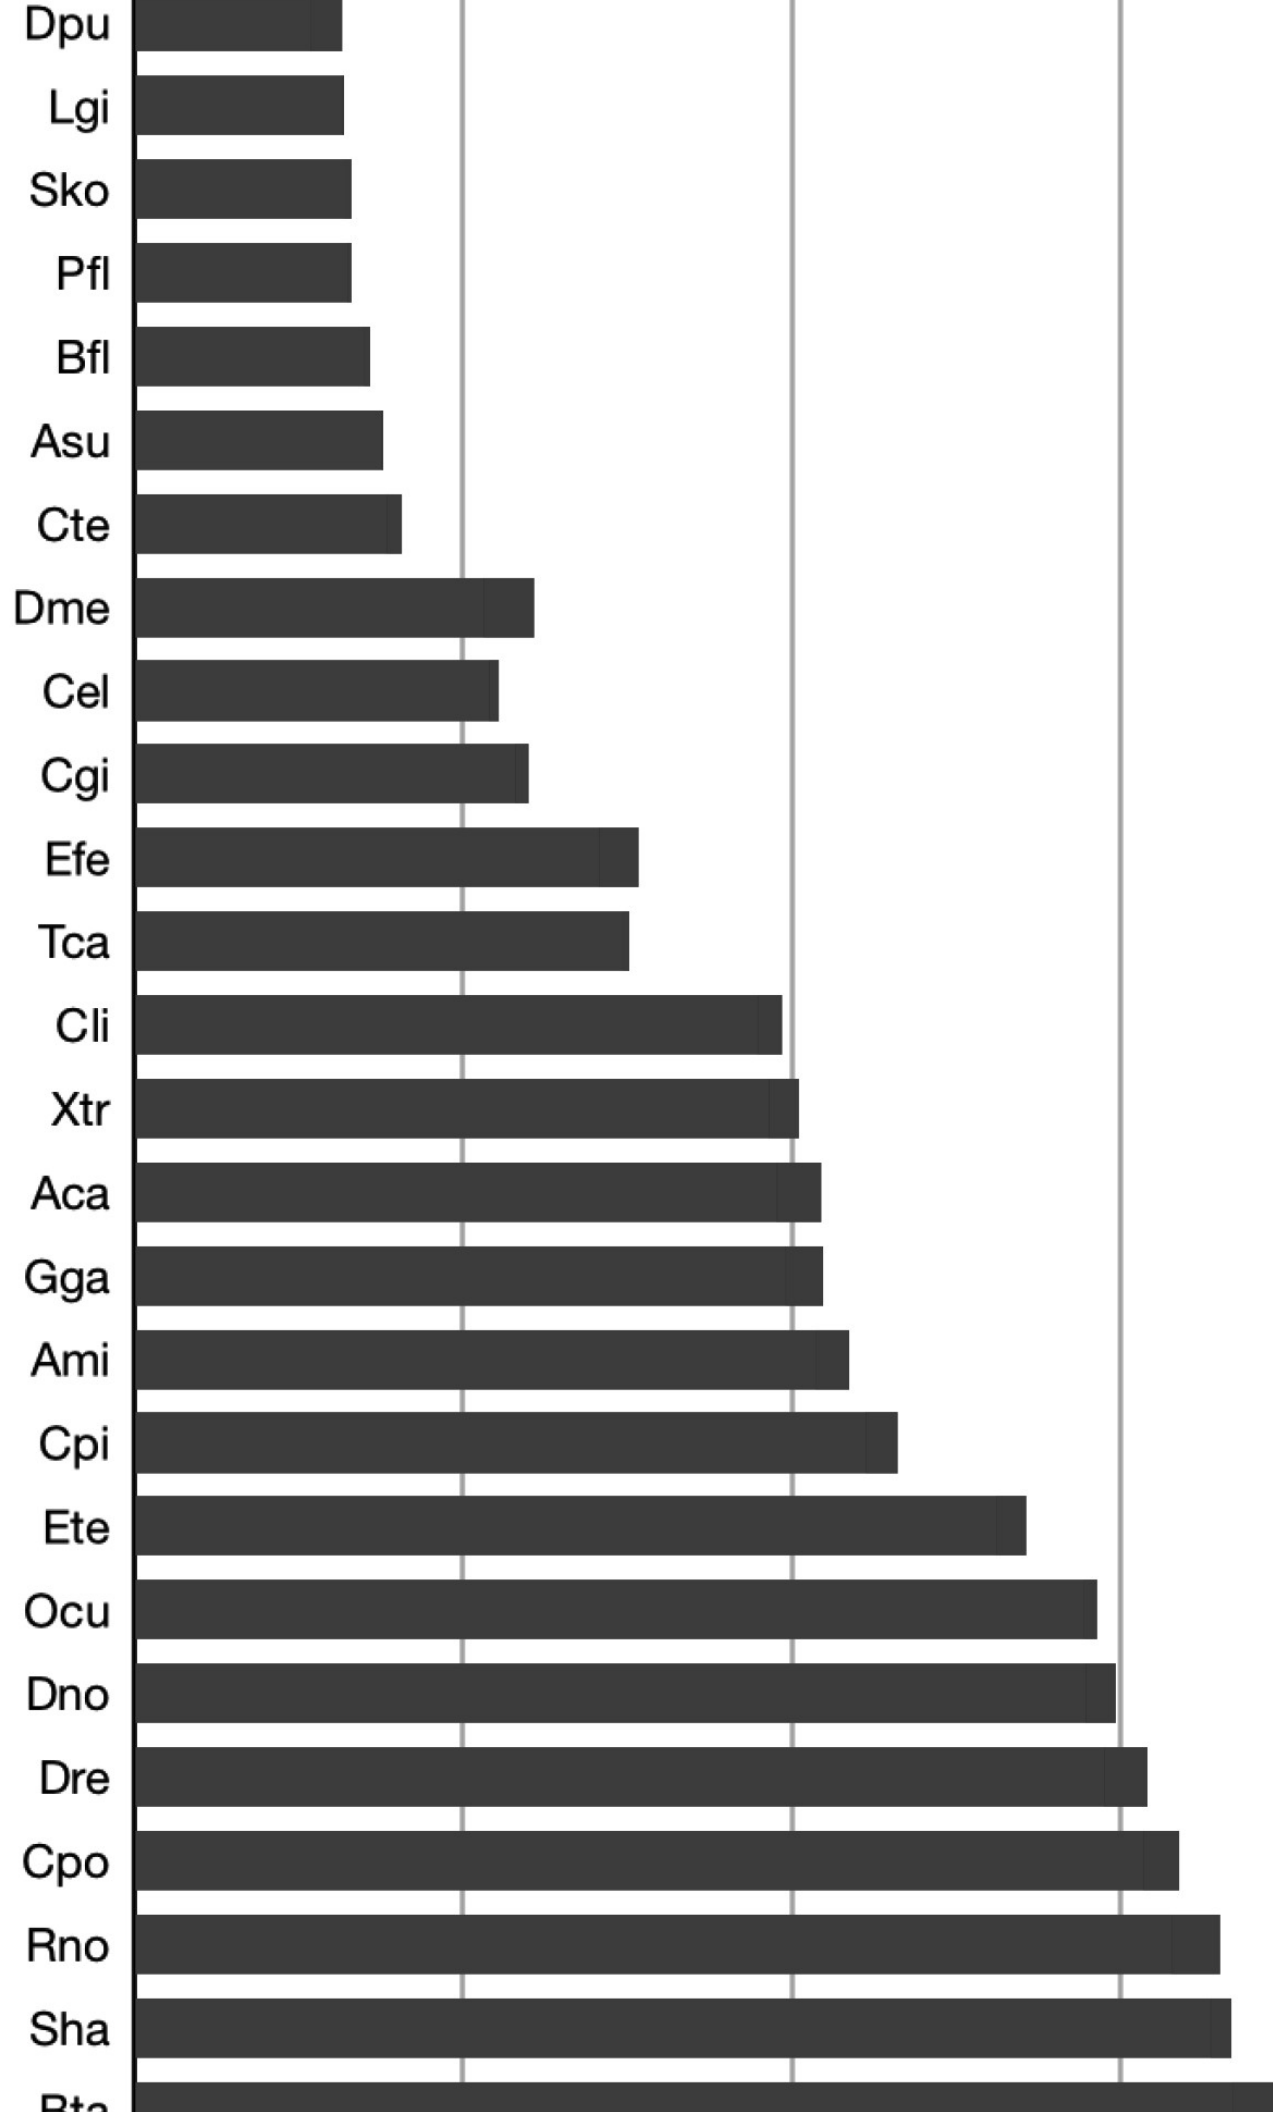

Supplement: turkjbio-43-274-sup009.pdf [file turkjbio-43-274-sup009.pdf]
